# Supplementary material for: Simulation of a phenobarbital molecularly imprinted polymerization self-assembly system and its adsorption property
Source: Royal Society of Chemistry journal article supplement (doi:10.1039/c9ay02539a), 2020-01-01
Supplement: c9ay02539a1.pdf [file c9ay02539a1.pdf]

# Supporting Information

## Simulation of Phenobarbital Molecularly Imprinted Polymerization Self-assembly System and Its Adsorption Property

Junbo Liu<sup>a</sup>, Wensi Zhao<sup>a</sup>, Guangyu Wang<sup>b</sup>, Shanshan Tang<sup>\*c</sup> and Ruifa Jin<sup>d</sup>

<sup>a</sup>*College of Resources and Environment, Jilin Agricultural University, Changchun 130118, China*

<sup>b</sup>*College of Food science and Engineering, Jilin Agricultural University, Changchun 130118, China*

<sup>c</sup>*College of Life Science, Key Laboratory of Straw Biology and Utilization, The Ministry of Education, Jilin Agricultural University,  
Changchun 130118, China*

<sup>d</sup>*College of Chemistry and Chemical Engineering, Chifeng University, Chifeng, 024000, China*

## S1 Selection processes of solvents

In the process of preparation the MIPs, the PHN, IA, and crossing-linking should dissolve in the same solvent. Thus, we investigated the solubility of all the components in the six solvents (water, acetonitrile, methyl alcohol, tetrahydrofuran, chloroform, methylbenzene). Moreover, the adsorption capacity of PHN-MIPs to PHN has also been detected. The results are shown in Table S1. As shown in Table S1, all the components are only freely soluble in acetonitrile and methyl alcohol. When the methyl alcohol as the solvent, the adsorption capacity of prepared PHN-MIPs to PHN is the largest. Additionally, the morphology of PHN-MIPs is uniform microspheres. Thus, we choose the methyl alcohol as the solvent to prepare the PHN-MIPs.

**Table S1** Solubility of PHN-IA complexes and its adsorption capacities in different solvents

| solvent         | solubility     | status | status after drying              | $Q$ (mg/g) |
|-----------------|----------------|--------|----------------------------------|------------|
| water           | insoluble      | ---    | ---                              | ---        |
| acetonitrile    | freely soluble | gel    | microspheres with various shapes | 4.85       |
| methyl alcohol  | freely soluble | gel    | uniform microspheres             | 5.42       |
| tetrahydrofuran | slight soluble | gel    | irregular bulk particles         | ---        |
| chloroform      | slight soluble | gel    | irregular bulk particles         | ---        |
| methylbenzene   | insoluble      | ---    | ---                              | ---        |

## S2 FT-IR analysis

In the Fig. S1, the peaks are at about 2984 and 1746  $\text{cm}^{-1}$ , corresponding to the O—H and C=O from the IA molecule in NIPs. In PHN-MIPs, the peaks of O—H and C=O present blue shift. It reveals that the O—H and C=O from IA may be formed hydrogen bonds with PHN.

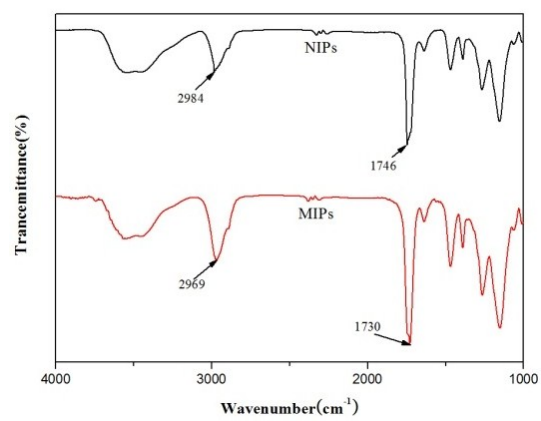

**Fig. S1** FT-IR spectra of the PHN-MIPs and NIPs
